# Supplementary material for: Morphology control of Cu and Cu2O through electrodeposition on conducting polymer electrodes
Source: Royal Society of Chemistry journal article supplement (doi:10.1039/d0qi01367f), 2021-01-01
Supplement: d0qi01367f1.pdf [file d0qi01367f1.pdf]

## Electronic Supplemental Information

### Morphology control of Cu and Cu<sub>2</sub>O through electrodeposition on conducting polymer electrodes

Yan Chun Sun<sup>\*a</sup>, Chun Yu Sun<sup>b</sup>, Zhong Xiang Chen<sup>a</sup>, Peng Wang<sup>a</sup>, Hai Tao Wang<sup>a</sup>, Ming Zhu Yao<sup>a,c</sup>,  
Song Wu<sup>a</sup> and Ping Xu<sup>\*b</sup>

<sup>a</sup>Heilongjiang River Fisheries Research Institute of Chinese Academy of Fishery Sciences /Laboratory of Quality&Safety Risk Assessment for Aquatic Products(Harbin), Ministry of Agriculture and Rural Areas, Haerbin 150070, P. R. China;

<sup>b</sup> MIIT Key Laboratory of Critical Materials Technology for New Energy Conversion and Storage, School of Chemistry and Chemical Engineering, Harbin Institute of Technology, Harbin 150001, China

<sup>c</sup> Department of Food Science and Engineering, College of Food Science and Technology, Shanghai Ocean University ,Shanghai 201306, P. R. China;

Email: sunyc2004@163.com (Y. C. Sun), pxu@hit.edu.cn (P. Xu)

### Additional Figures

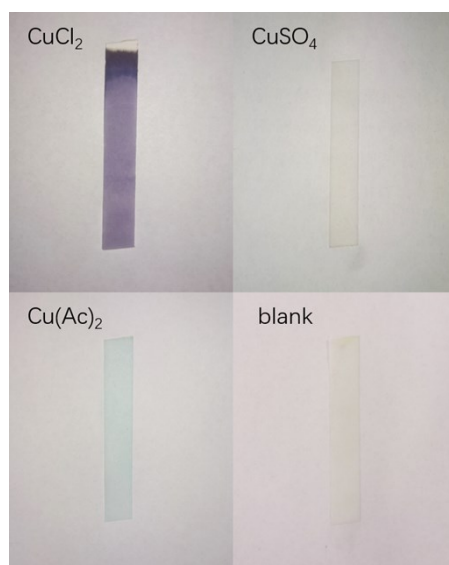

**Fig. S1** The color of the potassium iodide-starch test paper immersed in the used electrolyte after 20 minutes.

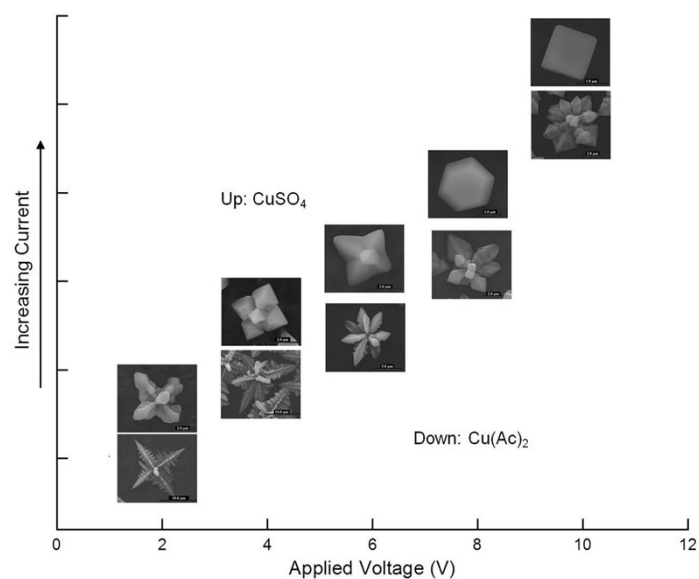

**Fig. S2** SEM images of Cu and Cu<sub>2</sub>O particles electrochemically deposited on PANI surfaces under various applied electric fields (2, 4, 6, 8, and 10 V). Cu and Cu<sub>2</sub>O particles are prepared by using copper sulfate and copper acetate as copper precursor, respectively.

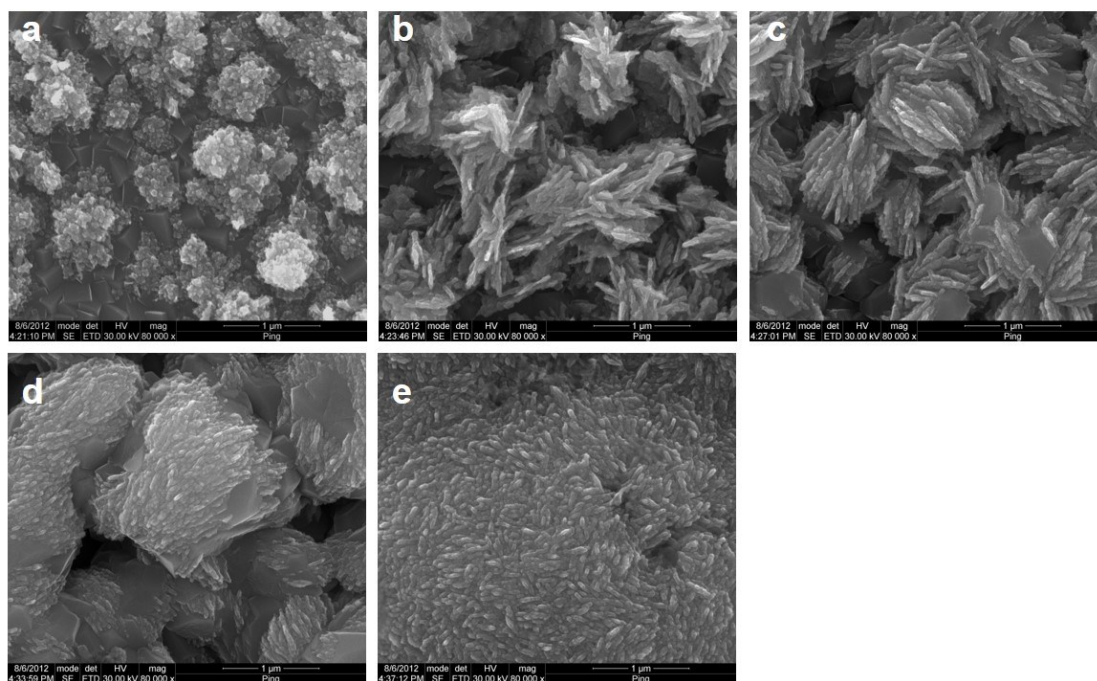

**Fig. S3** SEM images of Cu<sub>2</sub>O particles electrochemically deposited on ITO surfaces from Cu(Ac)<sub>2</sub> concentration (a) 5 mM, (b) 10 mM, (c) 20 mM, (d) 50 mM, and (e) 100 mM. Applied voltage: 2 V, electrodeposition time: 10 min.

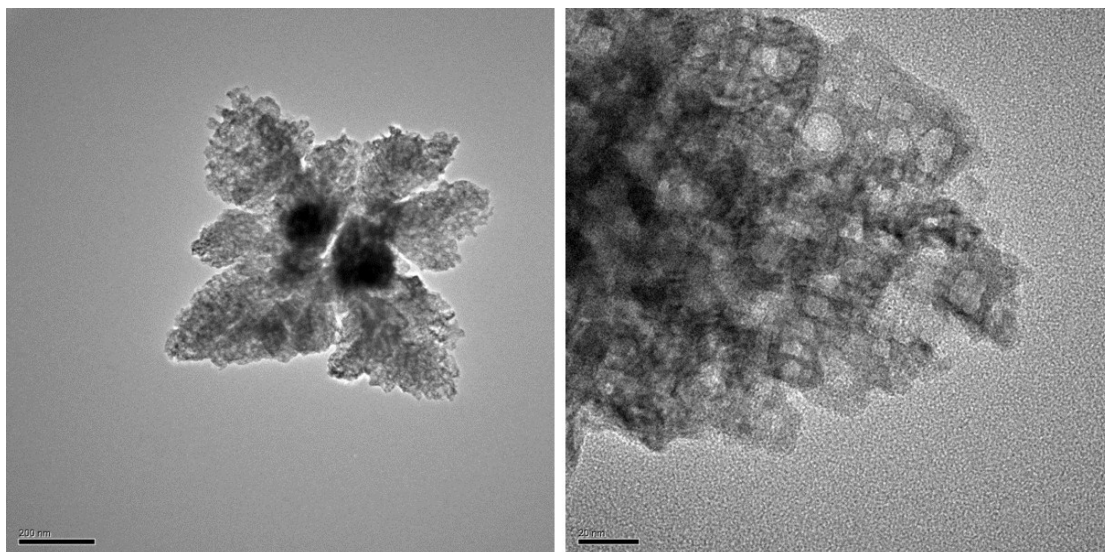

**Fig. S4** TEM images of  $\text{Cu}_2\text{O}$  particles deposited on PANI surface from 50 mM  $\text{Cu}(\text{Ac})_2$  at a reaction time of 2 s. Applied voltage: 6 V.
